# Supplementary material for: Sirtuins’ Deregulation in Bladder Cancer: SIRT7 Is Implicated in Tumor Progression through Epithelial to Mesenchymal Transition Promotion
Source: PubMed Central journal article supplement (PMC7281198; doi:10.3390/cancers12051066), 2020-04-25
Supplement: cancers-12-01066-s001.pdf [file cancers-12-01066-s001.pdf]

# Sirtuins' Deregulation in Bladder Cancer: SIRT7 Is Implicated in Tumor Progression Through Epithelial to Mesenchymal Transition Promotion

Sara Monteiro-Reis, Ana Lameirinhas, Vera Miranda-Gonçalves, Diana Montezuma, Paula C. Dias, Jorge Oliveira, Inês Graça, Céline S. Gonçalves, Bruno M Costa, Rui Henrique and Carmen Jerónimo

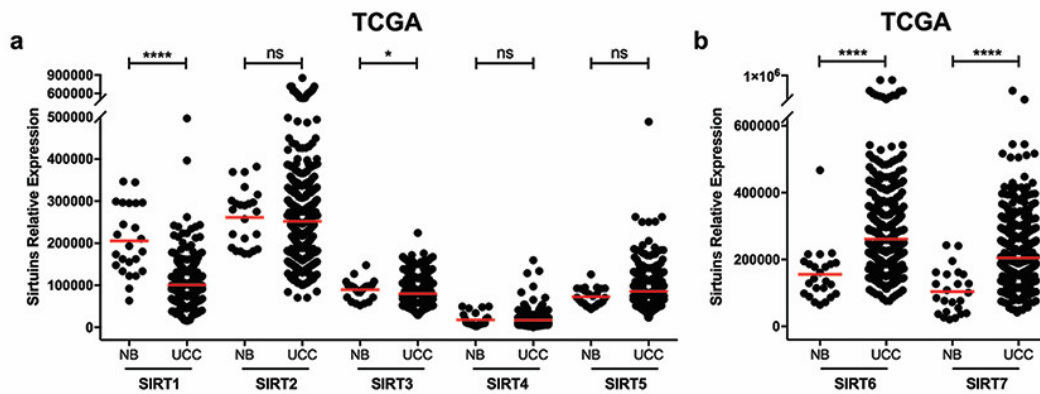

**Figure S1:** Characterization of SIRT1, SIRT2, SIRT3, SIRT4 and SIRT5 (a), and SIRT6 and SIRT7 (b) in the TCGA bladder cancer cohort by quantitative RT-PCR. \*  $p < 0.05$ , \*\*\*\*  $p < 0.0001$  and ns—non significant. UCC—urothelial cell carcinoma, NB—normal bladder mucosae.

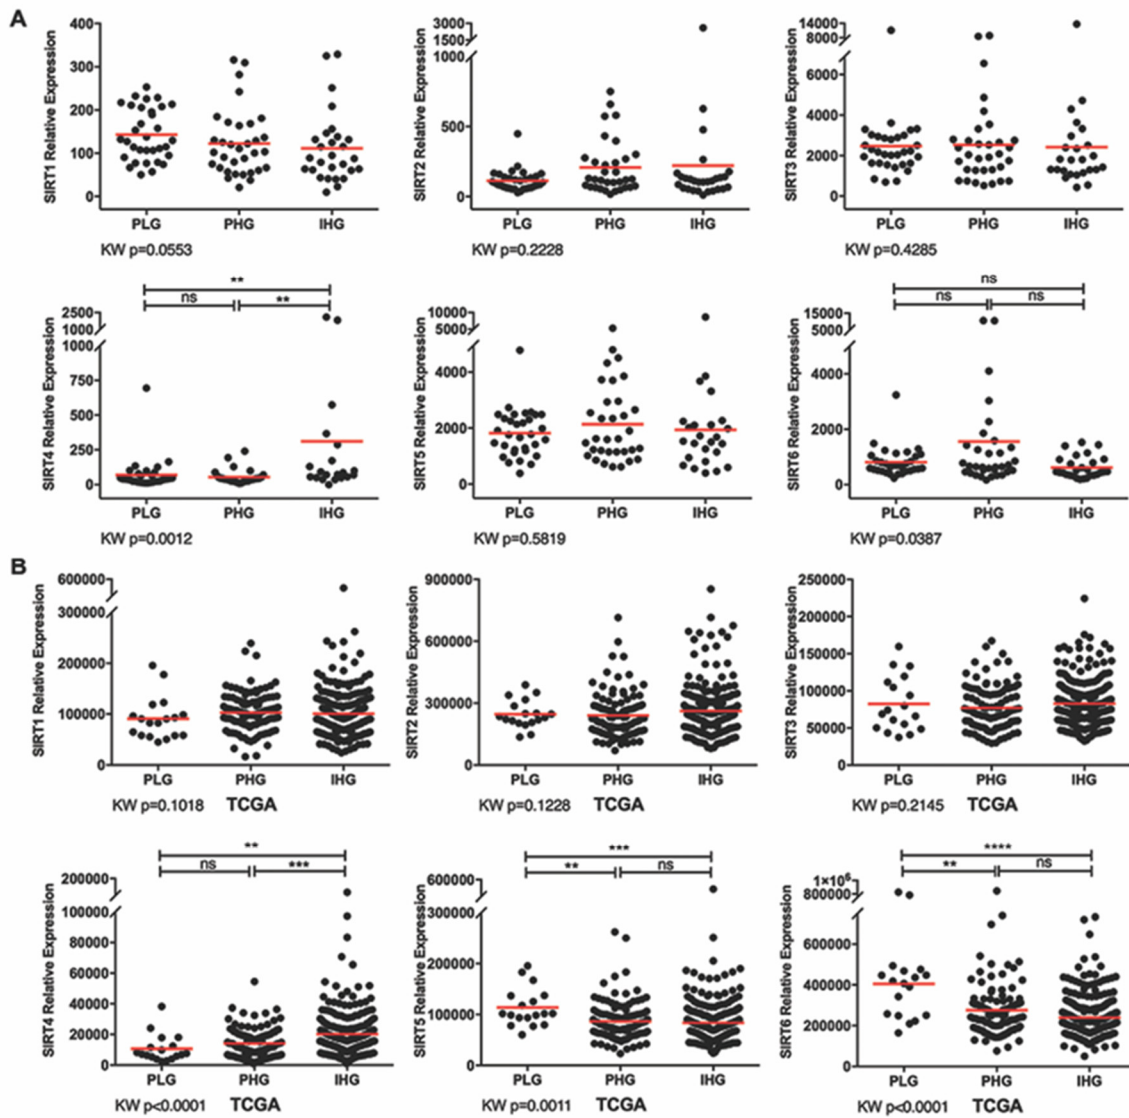

**Figure S2:** Characterization of Sirtuin family (SIRT1 to SIRT7) gene expression in bladder cancer tissues (a) and TCGA cohort (b) categorized by clinical grade. \*\*  $p < 0.01$ , \*\*\*  $p < 0.001$ , \*\*\*\*  $p < 0.0001$  and ns – non significant. PLG – papillary low-grade, PHG – papillary high-grade, IHG – invasive high-grade.

### SIRT7 Immunohistochemistry

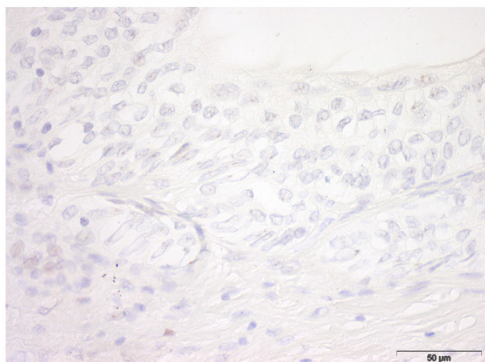

Normal Urothelium

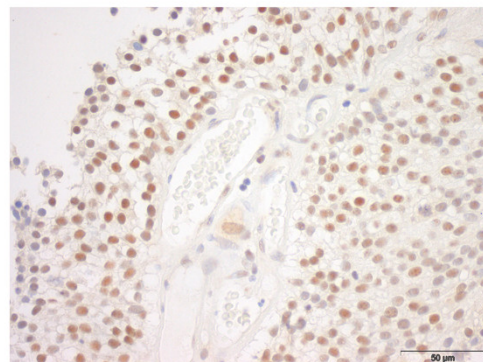

Bladder Carcinoma

**Figure S3:** Immunohistochemistry representative images for SIRT7 immunoexpression in normal urothelium and bladder urothelial carcinoma tissue sections.

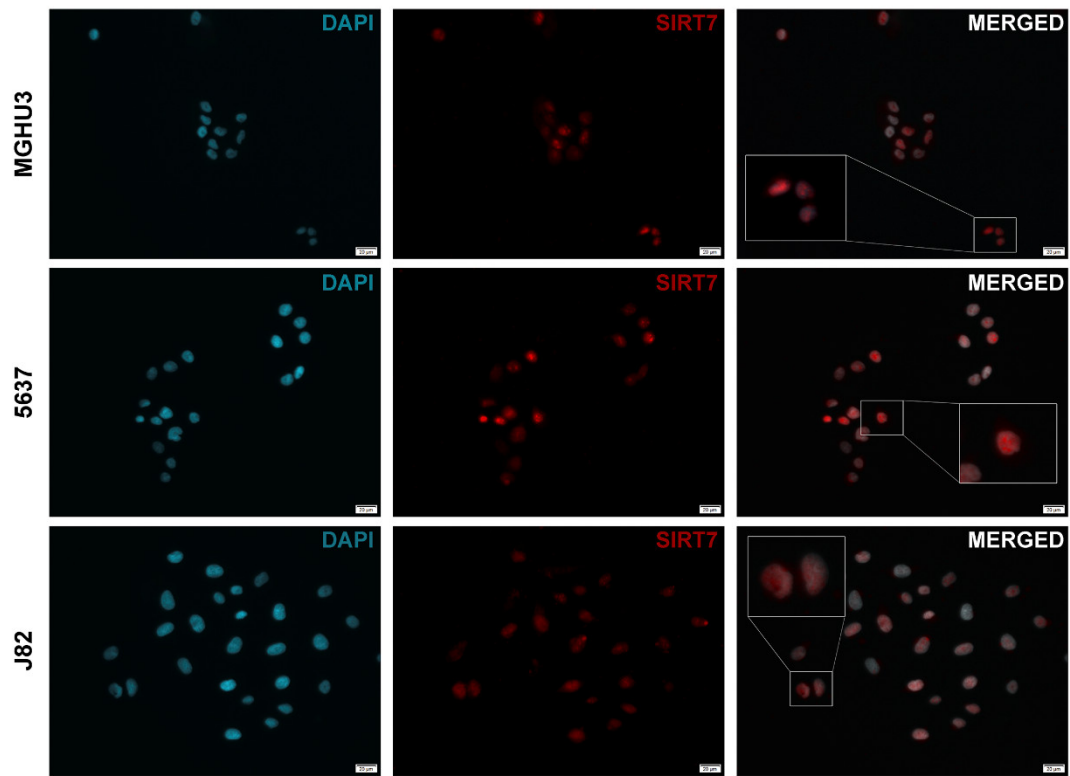

**Figure S4.** Immunofluorescence representative images for SIRT7 immunoexpression in MGHU3, 5637 and J82 bladder cancer cell lines (100× magnification).

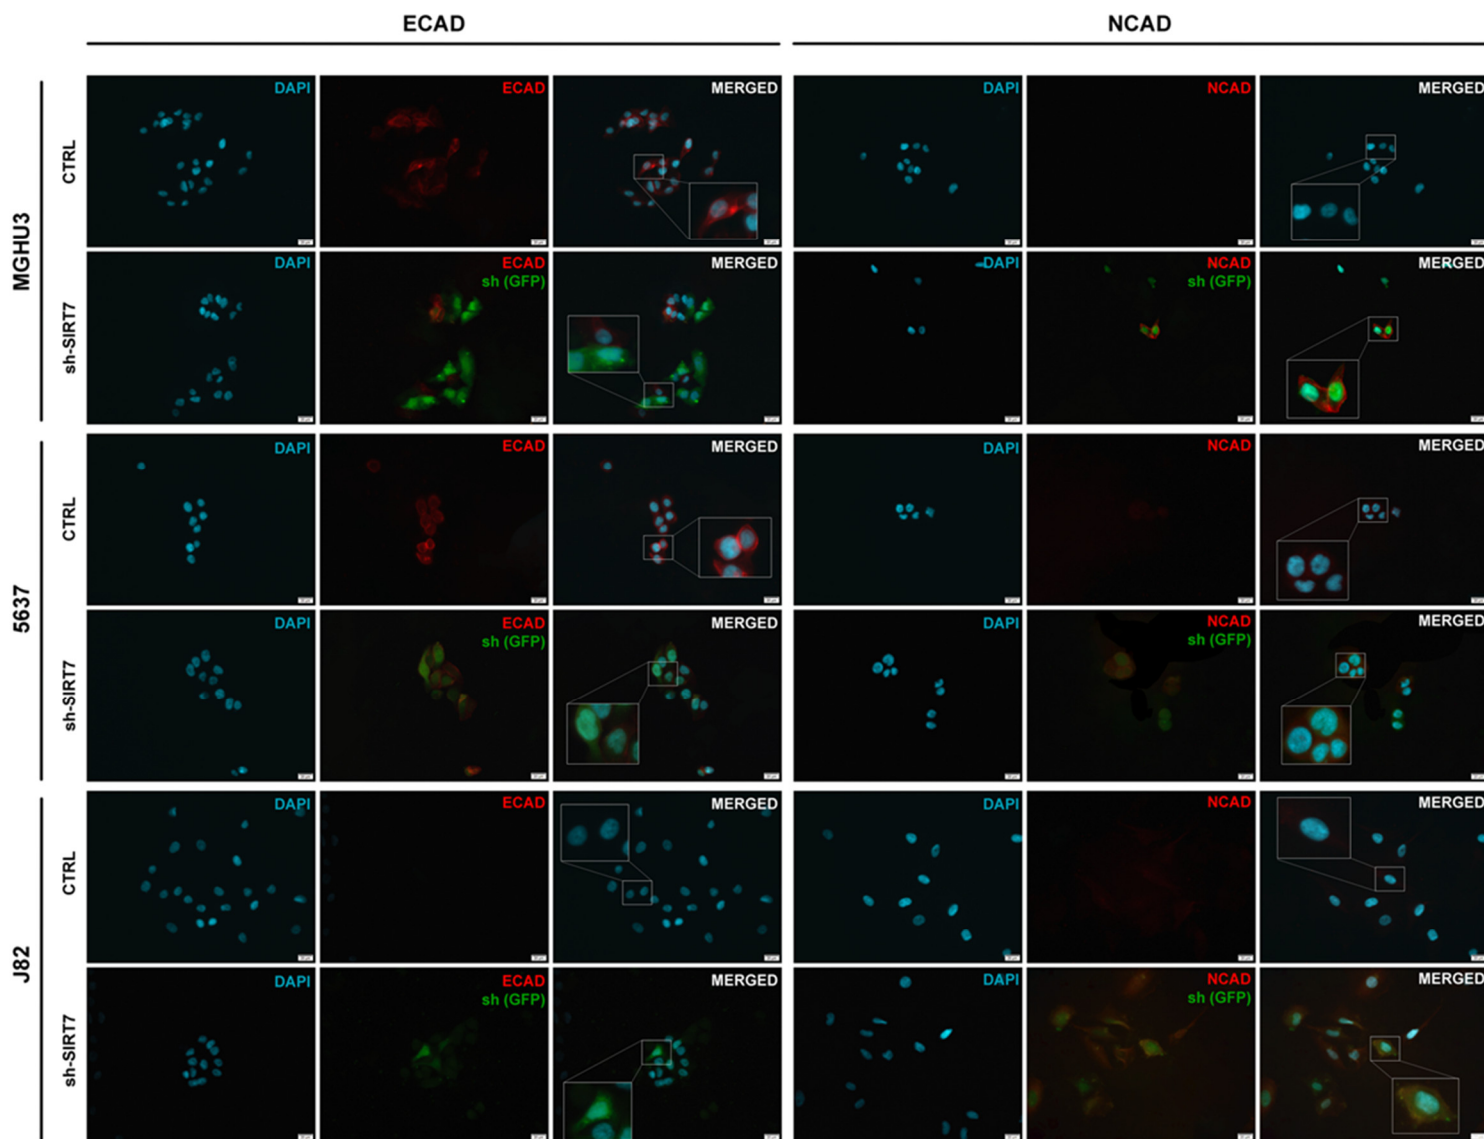

**Figure S5:** Immunofluorescence representative images for E-Cadherin and N-Cadherin immunoexpression in sh-CTRL and sh-SIRT7 MGHU3, 5637 and J82 bladder cancer cell lines (100× magnification).

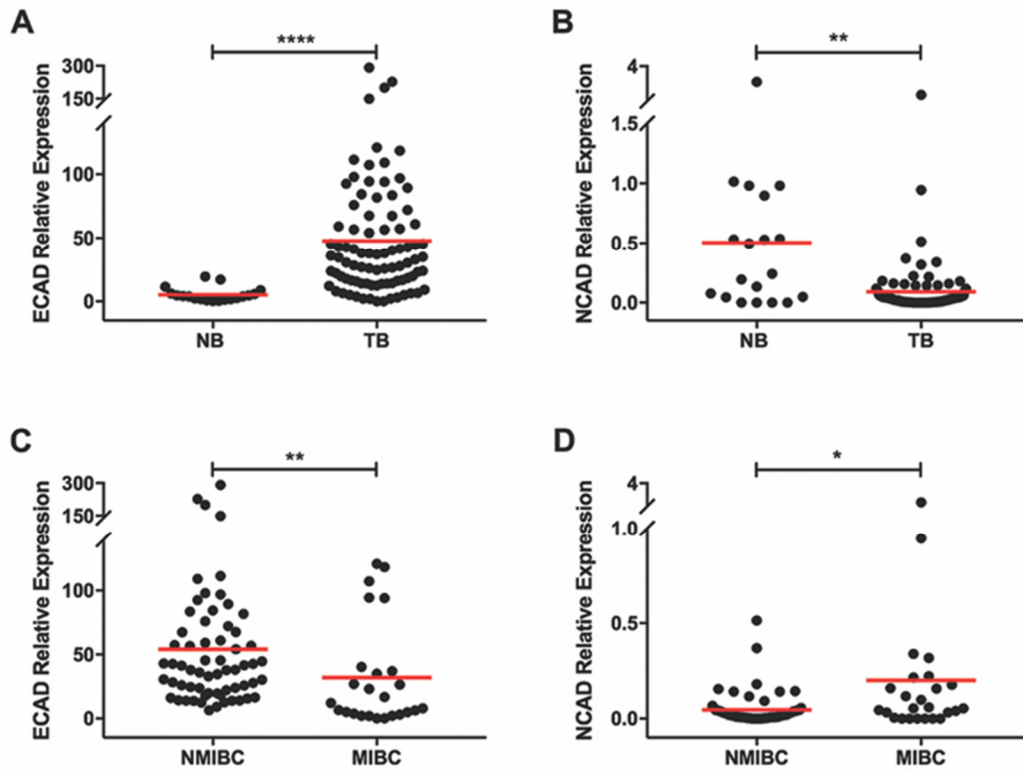

**Figure S6.** Characterization of *CDH1* gene expression in the bladder cancer and normal mucosae tissue samples (a), and in non-muscle invasive bladder cancer cases (b), by quantitative RT-PCR. Characterization of *CDH2* gene expression in the bladder cancer and normal mucosae tissue samples (c), and in non-muscle invasive (NMIBC) and muscle-invasive bladder cancer (MIBC) cases (d), by quantitative RT-PCR. \*  $p < 0.05$ , \*\*  $p < 0.01$  and \*\*\*\*  $p < 0.0001$ .

# MIBC

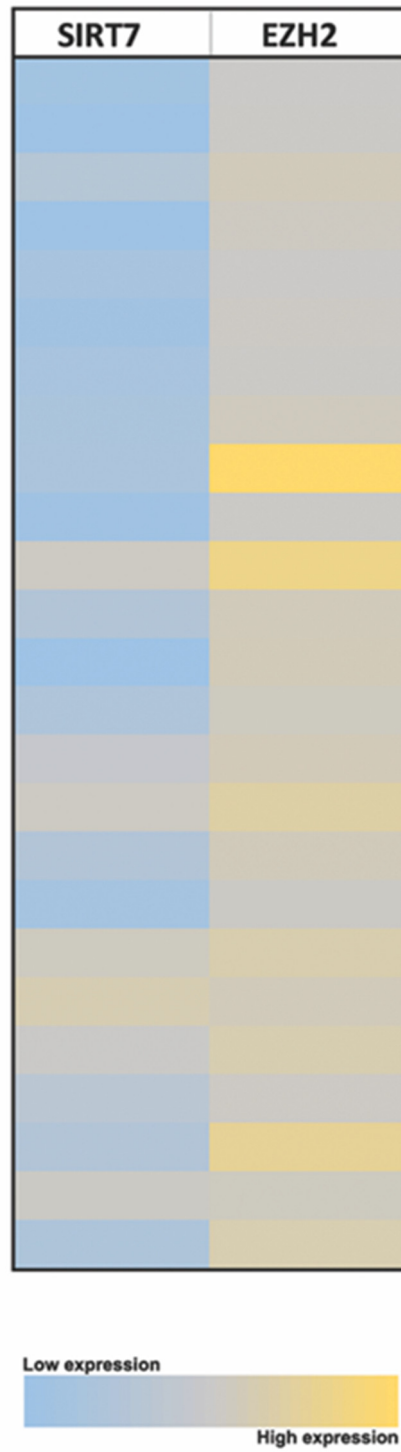

**Figure S7.** Heat map showing SIRT7 and EZH2 expression in muscle invasive bladder cancer (MIBC) cases ( $n = 26$ ). Relative expression levels are depicted in colours from dark blue (lower expression), to dark yellow (higher expression) as shown in the colour bar below the graphic.

**Table S1.** Reference of TaqMan® gene expression assays for studied genes.

| <b>Gene</b>  | <b>Reference ID</b> |
|--------------|---------------------|
| <i>HPRT1</i> | Hs01003267_m1       |
| <i>NCAD</i>  | Hs00354986_m1       |
| <i>SDHA</i>  | Hs00417200_m1       |
| <i>SIRT1</i> | Hs01009005_m1       |
| <i>SIRT2</i> | Hs00247263_m1       |
| <i>SIRT3</i> | Hs00202030_m1       |
| <i>SIRT4</i> | Hs00202033_m1       |
| <i>SIRT5</i> | Hs00978335_m1       |
| <i>SIRT6</i> | Hs00213036_m1       |
| <i>SIRT7</i> | Hs01034735_m1       |

**Table S2.** Primer sequences used in RT-PCR for studied genes.

| <b>Gene</b> | <b>Forward sequence (5'-3')</b> | <b>Reverse sequence (5'-3')</b> | <b>Annealing T. (°C)</b> |
|-------------|---------------------------------|---------------------------------|--------------------------|
| <i>BGUS</i> | CTCATTGGAATTTGCCGATT            | CCGAGTGAAGATCCCCTTTTA           | 60                       |
| <i>ECAD</i> | CTTGACGCCGAGAGCTACA             | AAATTCACTCTGCCCAGGACG           | 64                       |
| <i>EZH2</i> | CCCTGACCTCTGTCTTACTTGTGGA       | ACGTCAGATGGTGCCAGCAATA          | 60                       |





| 5637     | ECAD film |          |               |          |       | Actin film |          |               |          |       | Ratios     |       |       |       |
|----------|-----------|----------|---------------|----------|-------|------------|----------|---------------|----------|-------|------------|-------|-------|-------|
|          | Band OD   | inverted | background OD | inverted | Net   | Band OD    | inverted | background OD | inverted | Net   | ECAD/ACTIN |       |       |       |
| sh-CTRL  | (1)       | 180,89   | 74,11         | 230,77   | 24,23 | 49,88      | 175,31   | 79,69         | 191,33   | 63,67 | 16,02      | 3,114 | 2,802 | 1,111 |
|          | (2)       | 154,13   | 100,88        | 227,56   | 27,44 | 73,44      | 173,95   | 81,05         | 192,47   | 62,53 | 18,52      | 3,965 |       | 1,415 |
|          | (3)       | 212,40   | 42,60         | 230,62   | 24,38 | 18,22      | 177,56   | 77,44         | 191,28   | 63,72 | 13,72      | 1,328 |       | 0,474 |
| sh-SIRT7 | (1)       | 206,51   | 48,49         | 231,23   | 23,77 | 24,72      | 172,34   | 82,66         | 190,21   | 64,79 | 17,87      | 1,383 |       | 0,494 |
|          | (2)       | 202,67   | 52,33         | 233,71   | 21,29 | 31,04      | 169,27   | 85,73         | 191,08   | 63,92 | 21,81      | 1,423 |       | 0,508 |
|          | (3)       | 205,21   | 49,79         | 230,89   | 24,11 | 25,68      | 173,88   | 81,12         | 192,90   | 62,10 | 19,02      | 1,350 |       | 0,482 |

| 5637     | NCAD film |          |               |          |       | Actin film |          |               |          |       | Ratios     |       |       |       |
|----------|-----------|----------|---------------|----------|-------|------------|----------|---------------|----------|-------|------------|-------|-------|-------|
|          | Band OD   | inverted | background OD | inverted | Net   | Band OD    | inverted | background OD | inverted | Net   | NCAD/ACTIN |       |       |       |
| sh-CTRL  | (1)       | 143,79   | 111,21        | 191,34   | 63,66 | 47,55      | 175,31   | 79,69         | 191,33   | 63,67 | 16,02      | 2,968 | 2,801 | 1,059 |
|          | (2)       | 150,44   | 104,56        | 193,89   | 61,11 | 43,45      | 173,95   | 81,05         | 192,47   | 62,53 | 18,52      | 2,346 |       | 0,837 |
|          | (3)       | 149,27   | 105,73        | 191,66   | 63,34 | 42,39      | 177,56   | 77,44         | 191,28   | 63,72 | 13,72      | 3,090 |       | 1,103 |
| sh-SIRT7 | (1)       | 113,83   | 141,17        | 191,21   | 63,79 | 77,38      | 172,34   | 82,66         | 190,21   | 64,79 | 17,87      | 4,330 |       | 1,546 |
|          | (2)       | 102,74   | 152,26        | 192,99   | 62,01 | 90,25      | 169,27   | 85,73         | 191,08   | 63,92 | 21,81      | 4,138 |       | 1,477 |
|          | (3)       | 114,01   | 140,99        | 192,17   | 62,83 | 78,16      | 173,88   | 81,12         | 192,90   | 62,10 | 19,02      | 4,109 |       | 1,467 |

| 5637     | SLUG film |          |               |          |       | Actin film |          |               |          |       | Ratios     |       |       |       |
|----------|-----------|----------|---------------|----------|-------|------------|----------|---------------|----------|-------|------------|-------|-------|-------|
|          | Band OD   | inverted | background OD | inverted | Net   | Band OD    | inverted | background OD | inverted | Net   | SLUG/ACTIN |       |       |       |
| sh-CTRL  | (1)       | 157,99   | 97,01         | 200,44   | 54,56 | 42,45      | 175,31   | 79,69         | 191,33   | 63,67 | 16,02      | 2,650 | 2,691 | 0,985 |
|          | (2)       | 162,41   | 92,59         | 205,79   | 49,21 | 43,38      | 173,95   | 81,05         | 192,47   | 62,53 | 18,52      | 2,342 |       | 0,871 |
|          | (3)       | 160,87   | 94,13         | 203,12   | 51,88 | 42,25      | 177,56   | 77,44         | 191,28   | 63,72 | 13,72      | 3,079 |       | 1,145 |
| sh-SIRT7 | (1)       | 125,71   | 129,29        | 203,57   | 51,43 | 77,86      | 172,34   | 82,66         | 190,21   | 64,79 | 17,87      | 4,357 |       | 1,619 |
|          | (2)       | 107,22   | 147,78        | 200,91   | 54,09 | 93,69      | 169,27   | 85,73         | 191,08   | 63,92 | 21,81      | 4,296 |       | 1,597 |
|          | (3)       | 116,58   | 138,42        | 200,32   | 54,68 | 83,74      | 173,88   | 81,12         | 192,90   | 62,10 | 19,02      | 4,403 |       | 1,636 |

| 5637     | SNAIL film |          |               |          |       | Actin film |          |               |          |       | Ratios      |       |       |       |
|----------|------------|----------|---------------|----------|-------|------------|----------|---------------|----------|-------|-------------|-------|-------|-------|
|          | Band OD    | inverted | background OD | inverted | Net   | Band OD    | inverted | background OD | inverted | Net   | SNAIL/ACTIN |       |       |       |
| sh-CTRL  | (1)        | 169,59   | 85,41         | 245,93   | 9,07  | 76,34      | 175,31   | 79,69         | 191,33   | 63,67 | 16,02       | 4,765 | 4,873 | 0,978 |
|          | (2)        | 161,33   | 93,67         | 243,60   | 11,40 | 82,27      | 173,95   | 81,05         | 192,47   | 62,53 | 18,52       | 5,442 |       | 0,912 |
|          | (3)        | 171,20   | 83,80         | 245,44   | 9,56  | 74,24      | 177,56   | 77,44         | 191,28   | 63,72 | 13,72       | 4,411 |       | 1,110 |
| sh-SIRT7 | (1)        | 89,90    | 165,10        | 243,71   | 11,29 | 153,81     | 172,34   | 82,66         | 190,21   | 64,79 | 17,87       | 8,607 |       | 1,766 |
|          | (2)        | 60,61    | 194,39        | 245,99   | 9,01  | 185,38     | 169,27   | 85,73         | 191,08   | 63,92 | 21,81       | 8,500 |       | 1,744 |
|          | (3)        | 79,55    | 175,45        | 241,87   | 13,13 | 162,32     | 173,88   | 81,12         | 192,90   | 62,10 | 19,02       | 8,534 |       | 1,751 |

| J82         | NCAD film |          |               |          |       | Actin film |          |               |          |       | Ratios     |       |       |       |
|-------------|-----------|----------|---------------|----------|-------|------------|----------|---------------|----------|-------|------------|-------|-------|-------|
|             | Band OD   | inverted | background OD | inverted | Net   | Band OD    | inverted | background OD | inverted | Net   | NCAD/ACTIN |       |       |       |
| sh-scramble | (1)       | 127,90   | 127,10        | 188,04   | 66,96 | 60,14      | 162,23   | 92,77         | 182,76   | 72,24 | 20,53      | 2,929 | 2,515 | 1,165 |
|             | (2)       | 134,65   | 120,35        | 190,21   | 64,79 | 55,56      | 155,12   | 99,88         | 183,94   | 71,06 | 28,82      | 1,928 |       | 0,767 |
|             | (3)       | 131,19   | 123,81        | 189,14   | 65,86 | 57,95      | 160,44   | 94,56         | 182,01   | 72,99 | 21,57      | 2,687 |       | 1,068 |
| sh-SIRT7    | (1)       | 104,51   | 150,49        | 188,37   | 66,63 | 83,86      | 161,91   | 93,09         | 180,39   | 74,61 | 18,48      | 4,538 |       | 1,805 |
|             | (2)       | 81,12    | 173,88        | 186,29   | 68,71 | 105,17     | 159,30   | 95,70         | 182,22   | 72,78 | 22,92      | 4,589 |       | 1,825 |
|             | (3)       | 91,72    | 163,28        | 189,01   | 65,99 | 97,29      | 161,19   | 93,81         | 182,17   | 72,83 | 20,98      | 4,637 |       | 1,844 |

| J82         | SNAIL film |          |               |          |       | Actin film |          |               |          |       | Ratios      |       |       |       |
|-------------|------------|----------|---------------|----------|-------|------------|----------|---------------|----------|-------|-------------|-------|-------|-------|
|             | Band OD    | inverted | background OD | inverted | Net   | Band OD    | inverted | background OD | inverted | Net   | SNAIL/ACTIN |       |       |       |
| sh-scramble | (1)        | 169,59   | 85,41         | 240,37   | 14,63 | 70,78      | 162,23   | 92,77         | 182,76   | 72,24 | 20,53       | 3,448 | 3,151 | 1,094 |
|             | (2)        | 161,33   | 93,67         | 241,24   | 13,76 | 79,91      | 155,12   | 99,88         | 183,94   | 71,06 | 28,82       | 2,773 |       | 0,880 |
|             | (3)        | 171,20   | 83,80         | 240,90   | 14,10 | 69,70      | 160,44   | 94,56         | 182,01   | 72,99 | 21,57       | 3,231 |       | 1,026 |
| sh-SIRT7    | (1)        | 153,10   | 101,90        | 238,73   | 16,27 | 85,63      | 161,91   | 93,09         | 180,39   | 74,61 | 18,48       | 4,634 |       | 1,471 |
|             | (2)        | 133,41   | 121,59        | 240,99   | 14,01 | 107,58     | 159,30   | 95,70         | 182,22   | 72,78 | 22,92       | 4,694 |       | 1,490 |
|             | (3)        | 145,02   | 109,98        | 241,04   | 13,96 | 96,02      | 161,19   | 93,81         | 182,17   | 72,83 | 20,98       | 4,577 |       | 1,453 |

| 5637     | EZHZ film |          |               |          |       | LMNB1 film |          |               |          |       | Ratios     |       |       |       |
|----------|-----------|----------|---------------|----------|-------|------------|----------|---------------|----------|-------|------------|-------|-------|-------|
|          | Band OD   | inverted | Background OD | inverted | Net   | Band OD    | inverted | Background OD | inverted | Net   | EZHZ/LMNB1 |       |       |       |
| sh-CTRL  | (1)       | 180,89   | 74,11         | 222,99   | 32,01 | 42,10      | 182,30   | 72,70         | 219,01   | 35,99 | 36,71      | 1,147 | 0,989 | 1,160 |
|          | (2)       | 154,13   | 100,88        | 219,94   | 35,06 | 65,82      | 181,34   | 73,66         | 220,82   | 34,18 | 39,48      | 1,667 |       | 1,686 |
|          | (3)       | 212,40   | 42,60         | 217,38   | 37,62 | 4,98       | 184,88   | 70,12         | 217,53   | 37,47 | 32,65      | 0,153 |       | 0,154 |
| sh-SIRT7 | (1)       | 169,47   | 85,53         | 241,38   | 13,62 | 71,91      | 180,39   | 74,61         | 221,28   | 33,72 | 40,89      | 1,759 |       | 1,779 |
|          | (2)       | 176,30   | 78,70         | 239,28   | 15,72 | 62,98      | 182,91   | 72,09         | 219,06   | 35,94 | 36,15      | 1,742 |       | 1,762 |
|          | (3)       | 178,17   | 76,83         | 240,25   | 14,75 | 62,08      | 182,49   | 72,51         | 218,48   | 36,52 | 35,99      | 1,725 |       | 1,744 |

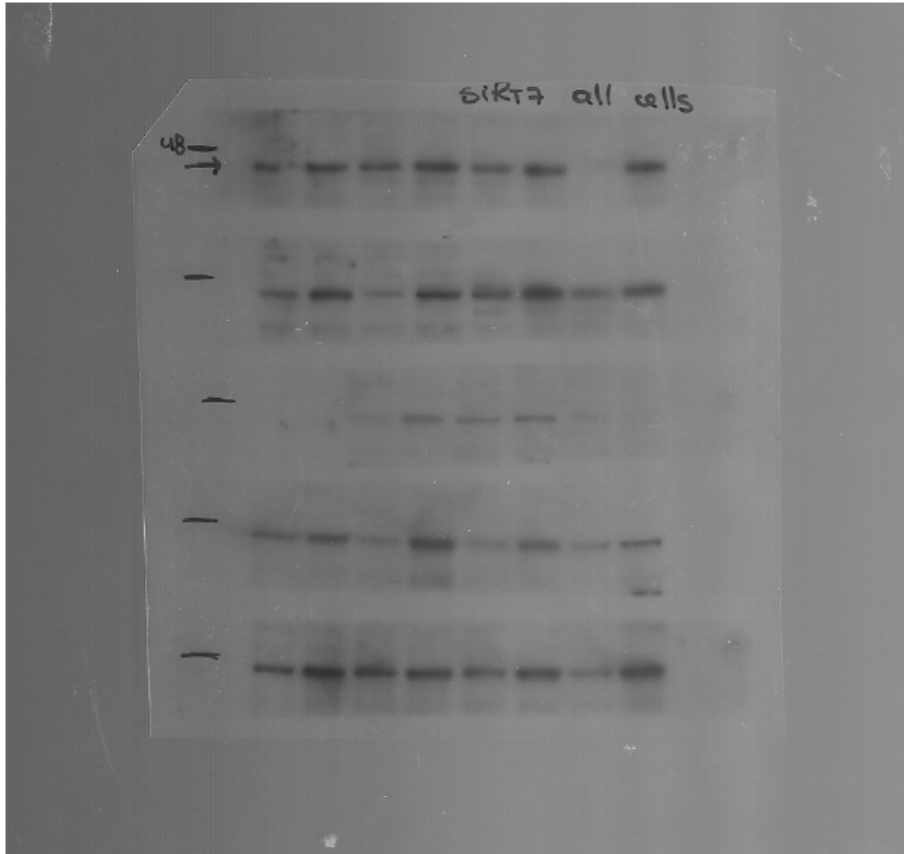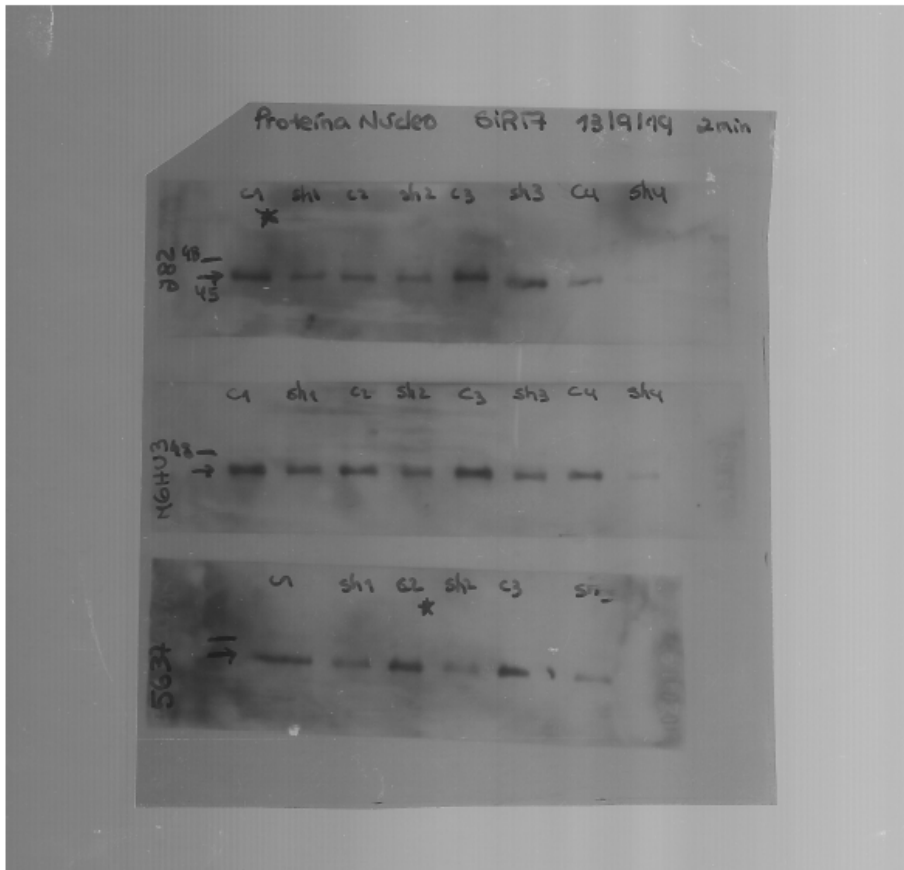

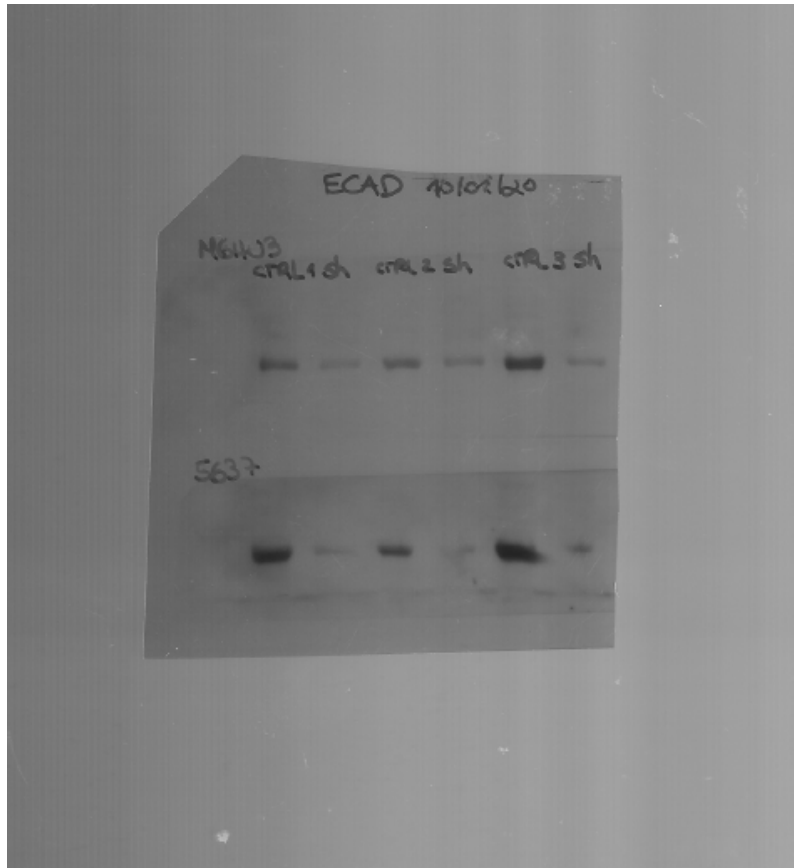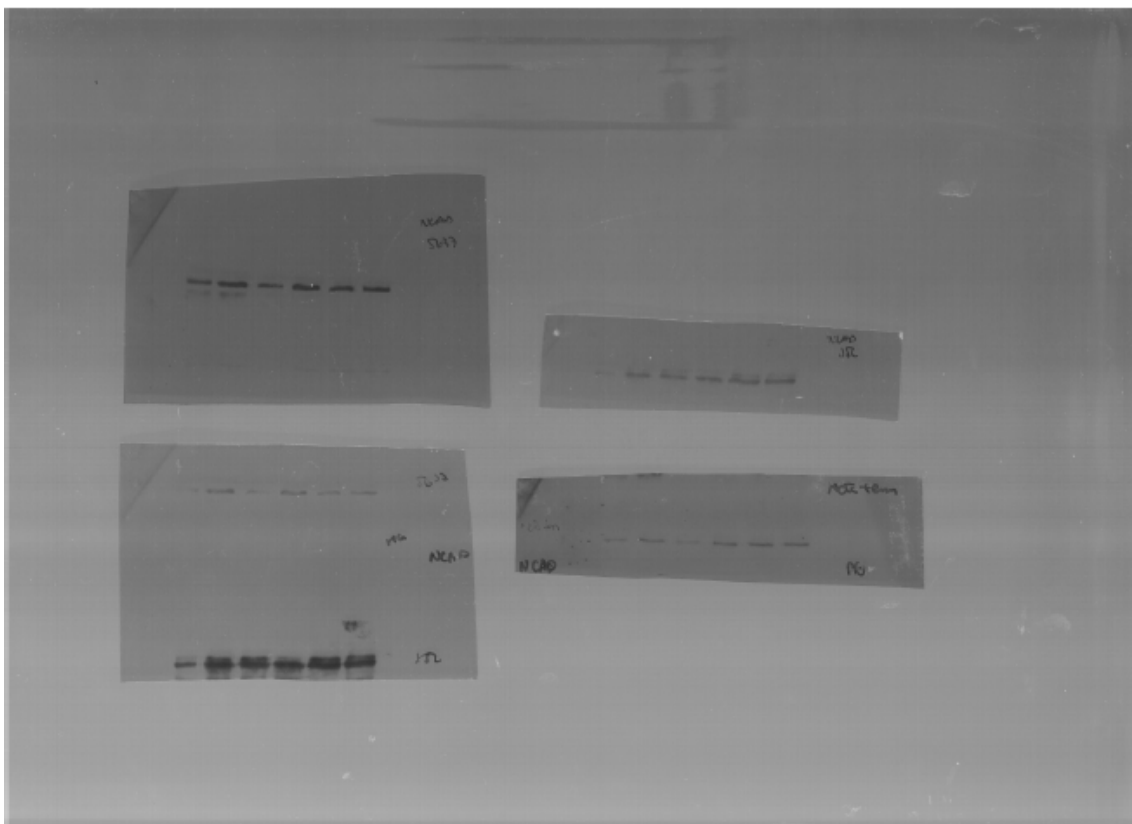

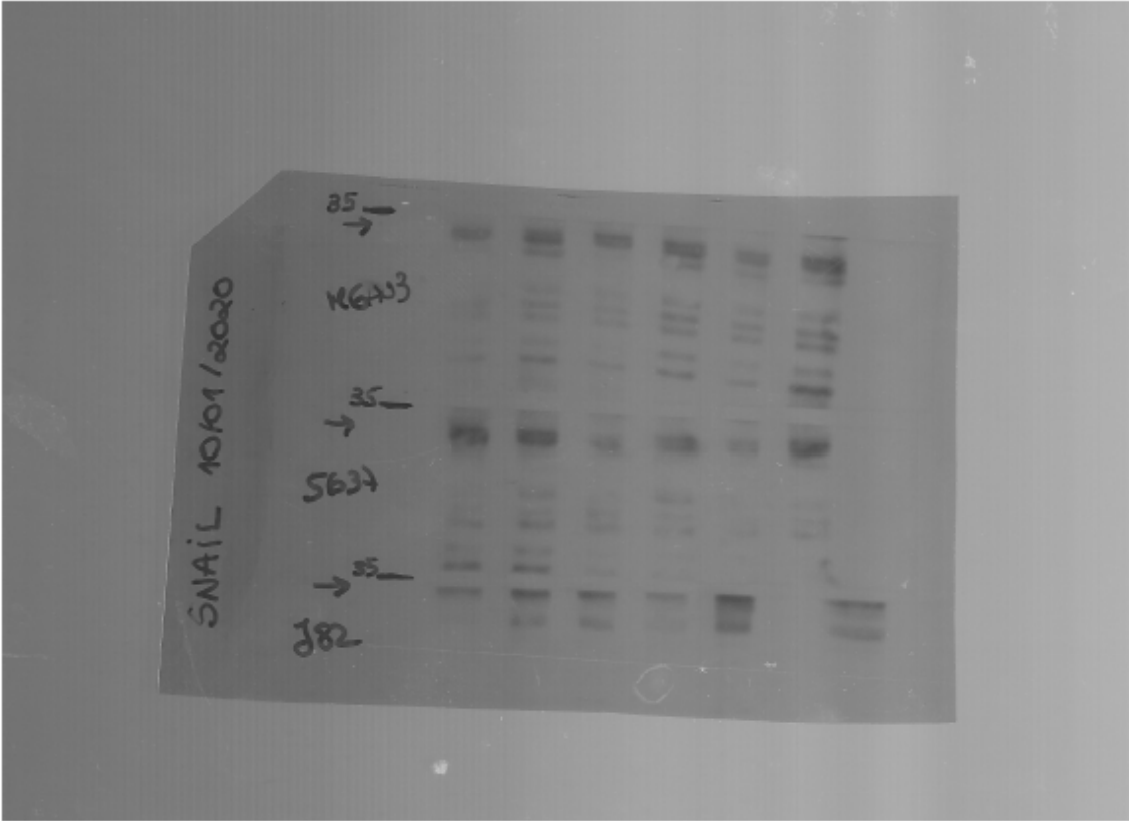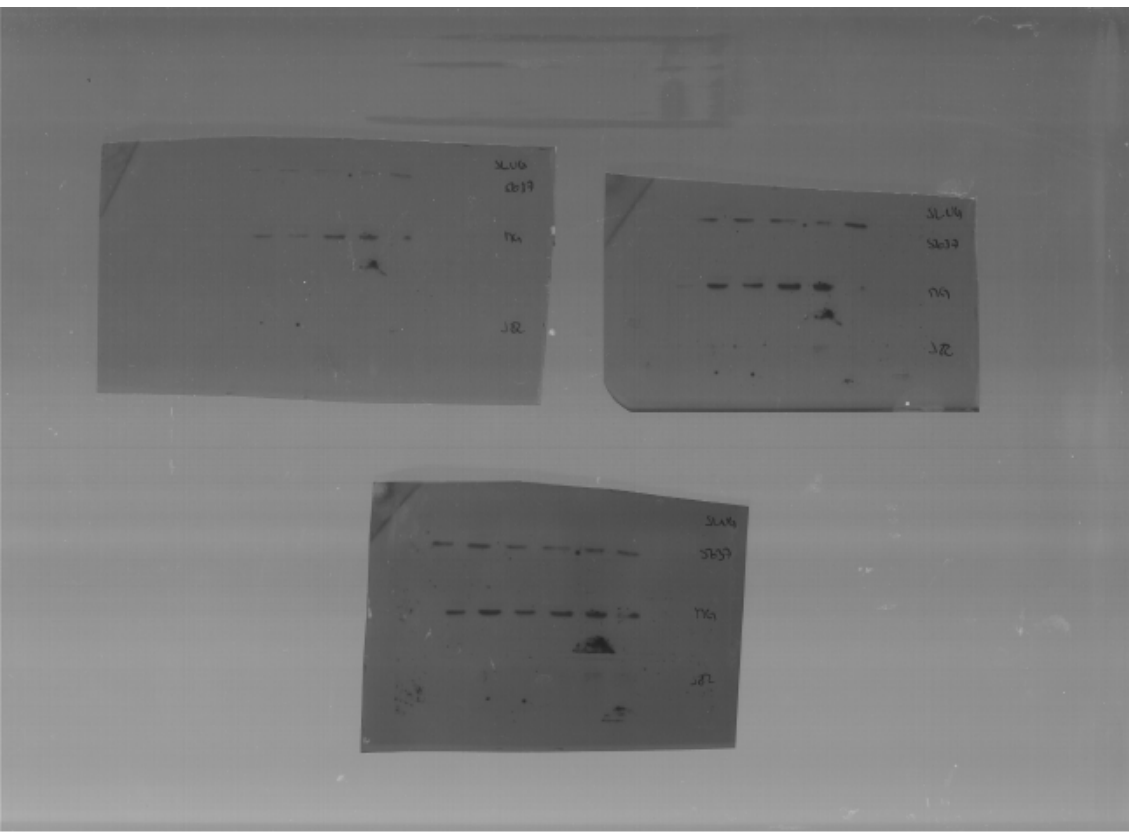

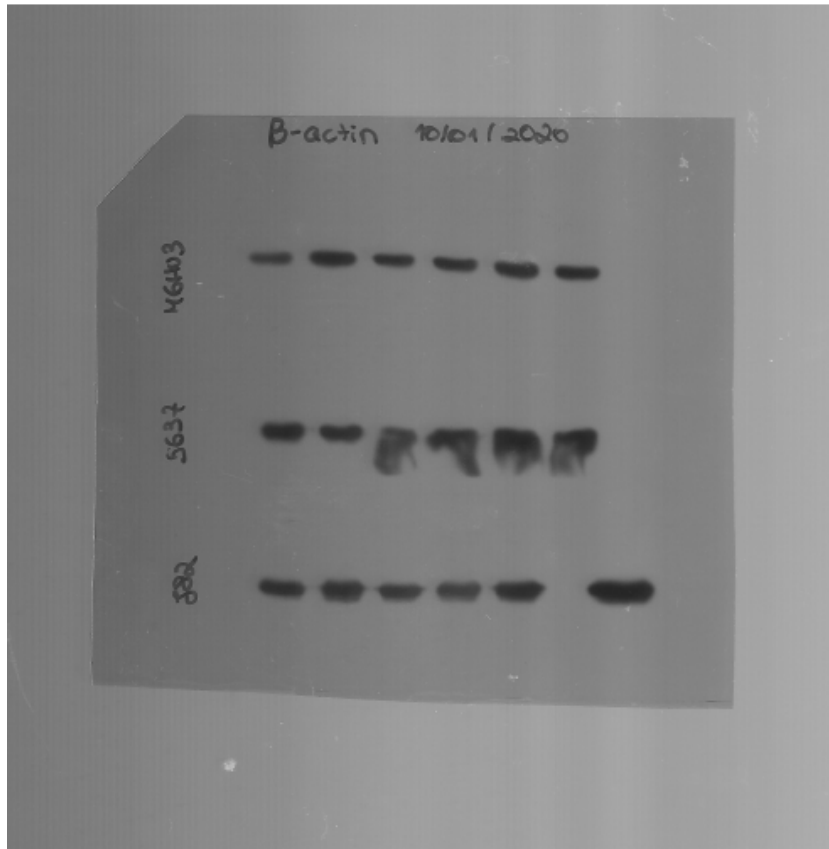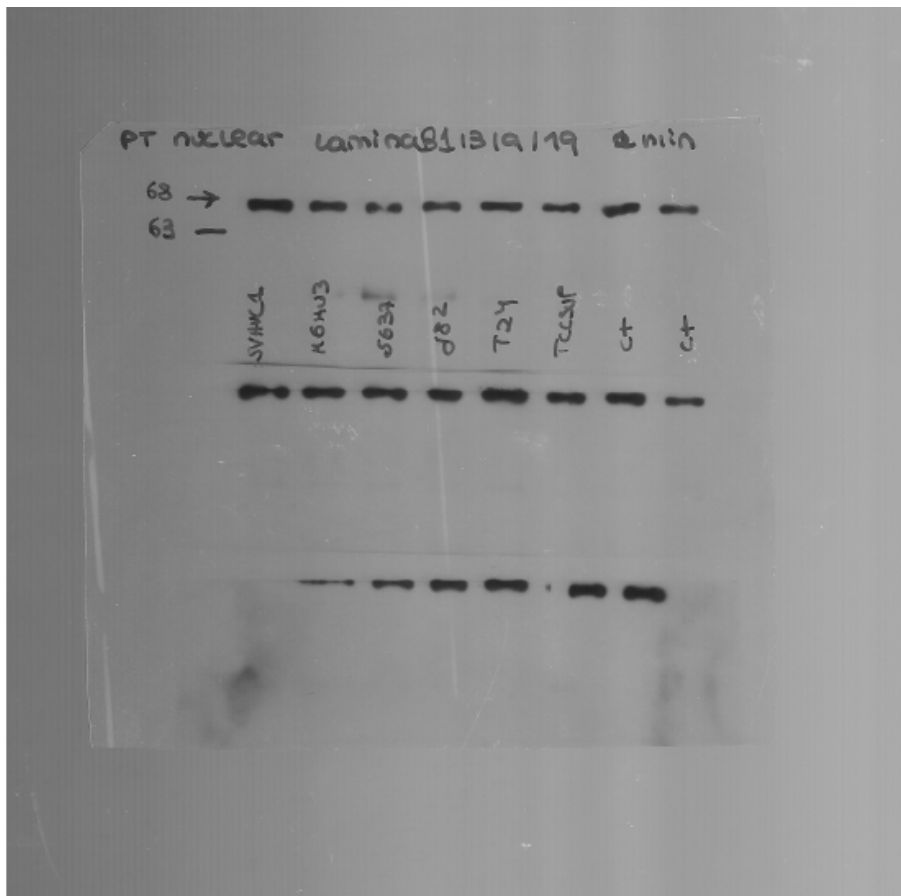

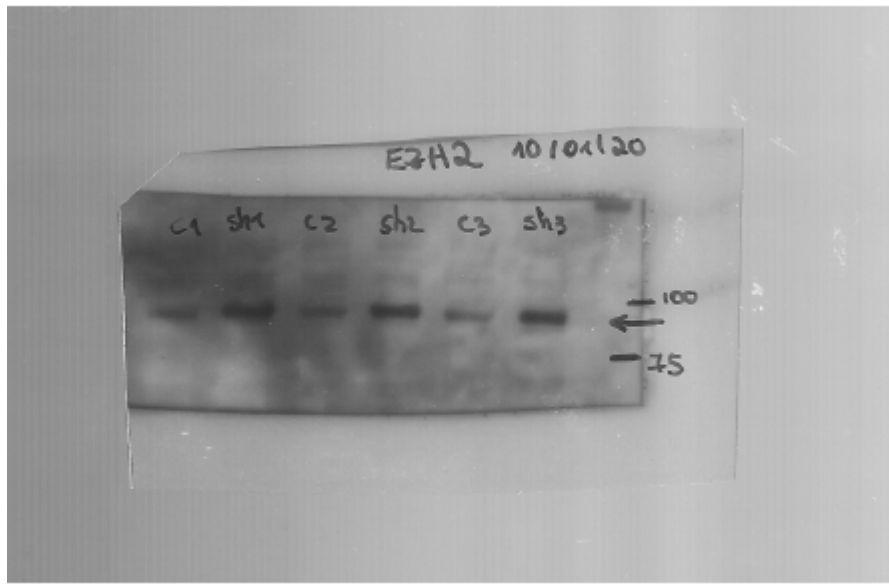

**Figure S8.** Detailed Information about Western Blot Figures 3, 4E and 5F.

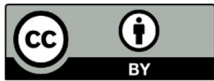

© 2020 by the authors. Licensee MDPI, Basel, Switzerland. This article is an open access article distributed under the terms and conditions of the Creative Commons Attribution (CC BY) license (<http://creativecommons.org/licenses/by/4.0/>).
